# Supplementary material for: Discovery and Validation of Novel Methylation Markers in Helicobacter pylori-Associated Gastric Cancer
Source: Hindawi journal article supplement (doi:10.1155/2021/4391133), 2021-12-08
Supplement: f1 [file 4391133.f1.pdf]

**Figure legends:**

**Figure S1.** Normalization and standardization of methylation data. (A) Unnormalized TCGA GC methylation data. (B) Normalized TCGA GC methylation data.

**Supplementary Table 1.** List of 2454 DMGs.

**Supplementary Table 2.** List of 228 DEGs.

**Supplementary Table 3.** Functional roles of the 28 genes.

**A**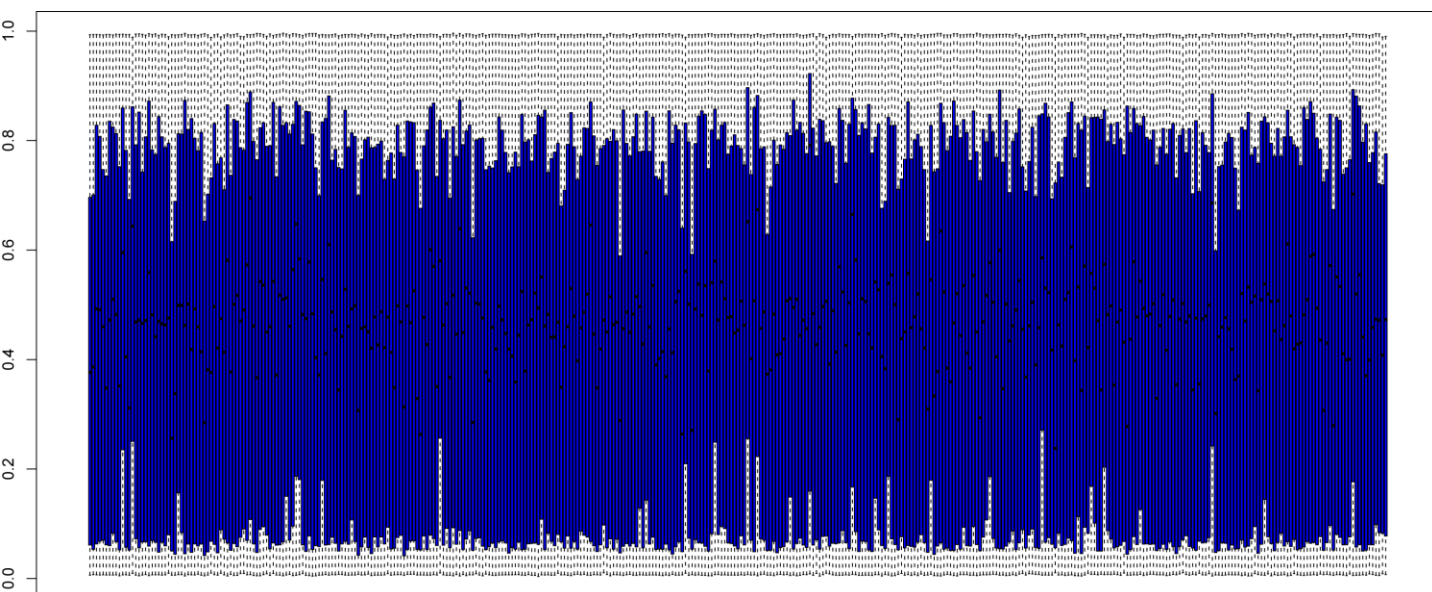**B**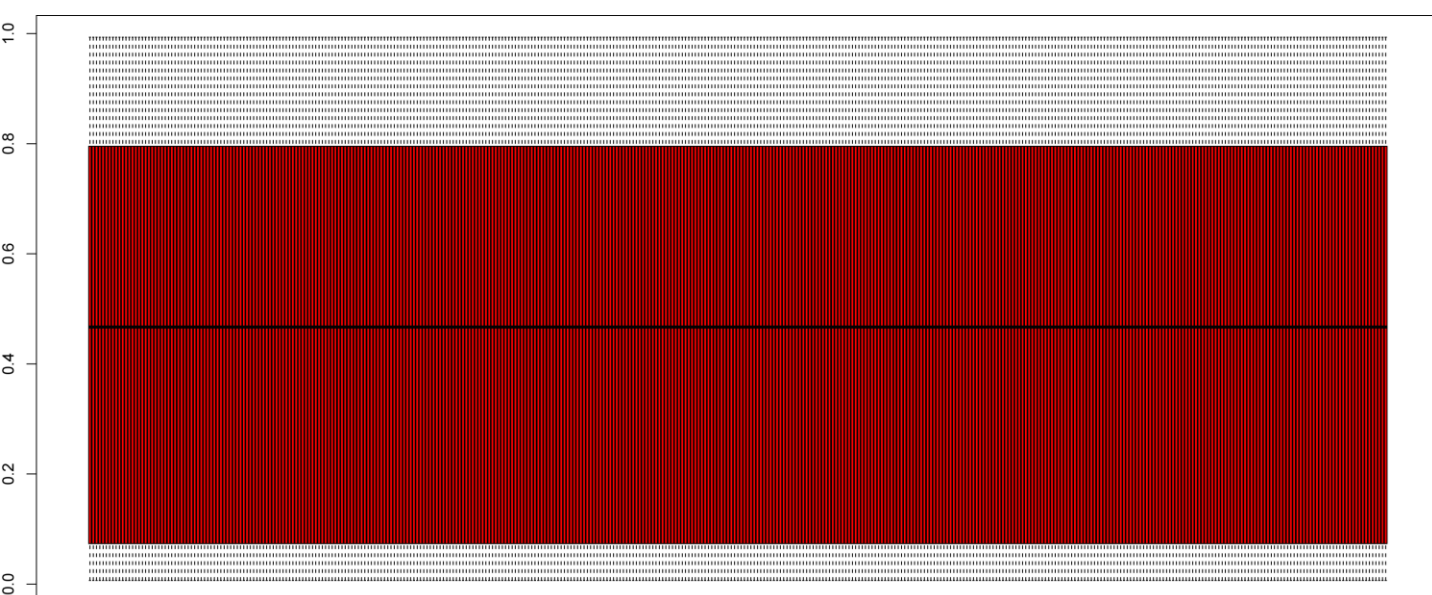

**Figure S1** Normalization and standardization of methylation data

|                |
|----------------|
| Genes          |
| ZXDC           |
| PSMD3          |
| NOMO2          |
| RNF144B        |
| EHBP1L1        |
| PLEC           |
| DIAPH3         |
| RERE           |
| UVSSA          |
| SYPL1          |
| TNRC6A         |
| CNPY3          |
| TP53BP2        |
| UBE2V2         |
| ASXL2          |
| ADPRHL2        |
| C1QBP          |
| RNF19A         |
| TCP11L1        |
| ZNF316         |
| RPRD1A         |
| THA1P          |
| C18orf8        |
| AKAP8L         |
| TCFL5          |
| LEMD3          |
| ALKBH8         |
| IWS1           |
| ZNF324B        |
| ABT1           |
| FAM20B         |
| KLF10          |
| RP11-1094H24.3 |
| NTPCR          |
| HDDC2          |
| COQ5           |
| ASB13          |
| POLM           |
| MRPS31         |
| PRKCD          |
| RP4-550H1.7    |
| ACSL3          |

|          |
|----------|
| CCDC71   |
| SCFD1    |
| COLGALT1 |
| ACLY     |
| HP1BP3   |
| MDN1     |
| LSM5     |
| DHX16    |
| FKBP8    |
| C1orf198 |
| TPI1     |
| HSPH1    |
| ALS2     |
| ARPC2    |
| DHDH     |
| KATNBL1  |
| TAF10    |
| ZNF318   |
| STRIP1   |
| YWHAG    |
| ZNF384   |
| RALGAPB  |
| TWISTNB  |
| GOLGB1   |
| CDAN1    |
| TWF1     |
| MLX      |
| TARBP1   |
| ATN1     |
| TGIF1    |
| OSGIN2   |
| CYB5R4   |
| LANCL2   |
| SLC43A2  |
| CHAMP1   |
| GABBR1   |
| RRP7B    |
| KDELC2   |
| ADD1     |
| MYBL1    |
| PDZD8    |
| PRSS16   |
| YWHAZ    |

|           |
|-----------|
| SECISBP2L |
| ASPHD2    |
| RAB1A     |
| MAP3K8    |
| ATP5G3    |
| RPH3AL    |
| MTFMT     |
| SLMO2     |
| RPS27     |
| PIP5K1A   |
| CCDC138   |
| CDC27     |
| USP49     |
| PIGU      |
| MTR       |
| LPCAT4    |
| UBE2K     |
| PNKP      |
| SIKE1     |
| AAR2      |
| SSC4D     |
| IL1RAP    |
| SLMAP     |
| PRDM15    |
| BRAT1     |
| SMYD5     |
| PIP4K2B   |
| INPP4A    |
| SKIL      |
| RUFY2     |
| ZNF621    |
| CDV3      |
| SPATA20   |
| SLC9A8    |
| RNF168    |
| HIP1R     |
| GANAB     |
| SPATA2    |
| BCL3      |
| SPTBN1    |
| VPS37D    |
| ZNF623    |
| C17orf70  |

|             |
|-------------|
| RANBP9      |
| MKNK2       |
| ADCK5       |
| HNRNPL      |
| TNIP1       |
| HELZ        |
| ZFPM1       |
| AKR1A1      |
| FAM195B     |
| GDPD1       |
| TTC27       |
| UNG         |
| ATP6V0A2    |
| PIP4K2C     |
| PCGF2       |
| TRA2A       |
| KBTBD2      |
| ARID3A      |
| SENP2       |
| FAM208B     |
| KB-1460A1.1 |
| KLHL25      |
| SAC3D1      |
| KIAA2018    |
| GLRX3       |
| RBM17       |
| DEGS1       |
| SLMO1       |
| CDK2AP1     |
| ITSN2       |
| NR1D1       |
| ATP1B3      |
| UBE2D1      |
| DDR1        |
| SMC3        |
| SNX8        |
| HSPA9       |
| SELM        |
| PCNP        |
| PHTF1       |
| RAB23       |
| RPS13       |
| E2F4        |

|             |
|-------------|
| PICK1       |
| BCL7B       |
| PFKL        |
| NR2C2AP     |
| USF1        |
| B3GNTL1     |
| VGLL4       |
| EID2        |
| ATF3        |
| MEGF8       |
| MSTO2P      |
| ITPKB       |
| CENPU       |
| ADSS        |
| DNAJC21     |
| NDUFS7      |
| COPRS       |
| CCDC134     |
| PRMT9       |
| PPOX        |
| ATG7        |
| CALR        |
| FAM222B     |
| NPTN        |
| PPP2R1B     |
| DIS3L2      |
| FRA10AC1    |
| TTLL1       |
| TCEA1       |
| SHMT1       |
| PHF3        |
| NOP2        |
| SF3B5       |
| STX7        |
| CDADC1      |
| OTUD3       |
| RP11-69J7.1 |
| NF2         |
| SLC25A23    |
| CDR2L       |
| MUM1        |
| PDE12       |
| EEA1        |

|          |
|----------|
| NR4A1    |
| DLST     |
| VPS54    |
| DDX41    |
| DCP2     |
| IFFO2    |
| PLEKHH3  |
| SSBP4    |
| C19orf25 |
| MMD      |
| MLK4     |
| STK35    |
| APTX     |
| BCL2     |
| FH       |
| TRABD2A  |
| NOL11    |
| TLE3     |
| CCNI     |
| KNSTRN   |
| AFG3L2   |
| FASTKD1  |
| CARM1    |
| KIAA0907 |
| TMEM14C  |
| PTPN12   |
| NUPL2    |
| VASP     |
| ARL2BP   |
| GNA13    |
| PEPD     |
| PLEKHM1P |
| LENG9    |
| TICAM1   |
| ATG5     |
| DESI2    |
| CNNM3    |
| WEE1     |
| MAPK9    |
| DYNC1LI1 |
| SCAMP2   |
| PDIK1L   |
| RALGAPA2 |



|               |
|---------------|
| BRD3          |
| NAA30         |
| P4HB          |
| SPECC1        |
| GNAI2         |
| MAD2L1BP      |
| VPS72         |
| DHX8          |
| RCOR3         |
| LHPP          |
| UBXN11        |
| CD55          |
| UBXN1         |
| ZSWIM5        |
| SPRED2        |
| NR4A2         |
| PAIP2         |
| RB1CC1        |
| HLA-E         |
| UHRF1         |
| ARL14EP       |
| CXADR         |
| RP11-756K15.2 |
| TSPAN13       |
| ZNF770        |
| SUPT5H        |
| EIF4H         |
| TRAF3         |
| VPS25         |
| CMTM6         |
| ZNF354A       |
| SLC16A13      |
| TAMM41        |
| DCUN1D4       |
| RABIF         |
| PLEKHB2       |
| IRF2BP1       |
| STK17A        |
| PYGB          |
| LMO4          |
| RP4-536B24.4  |
| TBL1XR1       |
| ANP32B        |

|            |
|------------|
| TSG101     |
| OPN3       |
| SPAG9      |
| TC2N       |
| RREB1      |
| PLEKHA3    |
| GTPBP3     |
| SPTLC2     |
| FZR1       |
| CCDC7      |
| CDC42SE2   |
| SLC25A36   |
| CPPED1     |
| ERO1L      |
| R3HDM4     |
| RPRD2      |
| ATP8B3     |
| CRLF3      |
| IARS2      |
| PNPT1      |
| ARF1       |
| GALNT2     |
| KANK2      |
| PPP6R2     |
| FBXO9      |
| CDK8       |
| FBXW11     |
| DHRS3      |
| SMAD6      |
| C1orf53    |
| TSNAXIP1   |
| TAGLN2     |
| ACSS1      |
| RNPEP      |
| TGFBR2     |
| ZNF235     |
| MCM3       |
| NDUFC1     |
| ABI2       |
| TMEM160    |
| KMT2A      |
| ST6GALNAC2 |
| VTA1       |

|            |
|------------|
| KDM1A      |
| LINC00620  |
| XYLB       |
| SMG9       |
| CHRAC1     |
| ASPSCR1    |
| PDCL3      |
| CUTA       |
| IKZF4      |
| POLRMT     |
| AC004967.7 |
| MRPL33     |
| MSH6       |
| ARID5B     |
| SLC39A10   |
| STIM2      |
| TTLL4      |
| PUM2       |
| PPP4R4     |
| JAGN1      |
| PSMA7      |
| RPE        |
| CDC16      |
| WBP2       |
| ABCB10     |
| DDX55      |
| RRM2       |
| PSRC1      |
| R3HCC1L    |
| ZFP36L1    |
| SLC26A2    |
| HERPUD1    |
| MAP2K3     |
| LSG1       |
| SNX3       |
| RARA       |
| RPS7       |
| DUSP2      |
| TMEM161A   |
| ILKAP      |
| CSNK1D     |
| EPS8       |
| CCNL1      |

|              |
|--------------|
| EDN1         |
| RP11-88E10.4 |
| RAP1A        |
| DUSP7        |
| ZNF683       |
| LRRC41       |
| TMEM70       |
| SSX2IP       |
| TTL          |
| DBNL         |
| DDX17        |
| JADE1        |
| PTBP2        |
| TCTN3        |
| PHLDA2       |
| LCLAT1       |
| RPL29        |
| TMED9        |
| ALMS1        |
| UBTF         |
| CNN2         |
| C16orf72     |
| NADK         |
| VPS26A       |
| ATP2C1       |
| PDCD2        |
| EPRS         |
| CREBL2       |
| MTERF4       |
| CHMP6        |
| SLC41A1      |
| FAM98C       |
| CALM1        |
| ARHGEF11     |
| MOGS         |
| AC004895.4   |
| DHRS13       |
| NECAP2       |
| ANGEL1       |
| TRIM27       |
| FAM208A      |
| HNRNPC       |
| NUS1         |

|          |
|----------|
| SLC35F5  |
| PRC1     |
| ABHD17A  |
| COPS4    |
| MRPL42   |
| PSMA1    |
| AP1G1    |
| PIK3CB   |
| ANKRD40  |
| TTC1     |
| MAST3    |
| EIF1AX   |
| ZNF557   |
| KIAA0141 |
| CLSPN    |
| PTK2B    |
| GRN      |
| HAX1     |
| RGL2     |
| CD47     |
| TOMM34   |
| DTWD2    |
| ZBED4    |
| COPS7A   |
| USP45    |
| DPP8     |
| SENP6    |
| SLC35E3  |
| TACO1    |
| DHX30    |
| HDAC7    |
| AP1M1    |
| POLR3B   |
| DDHD2    |
| BUB1     |
| UHRF2    |
| FOXN2    |
| LBR      |
| MDM4     |
| S100A6   |
| CRADD    |
| FARSB    |
| TRMT10C  |

|               |
|---------------|
| PFKP          |
| RABEP2        |
| CLPTM1L       |
| ASNA1         |
| GADD45B       |
| ADAR          |
| ESCO2         |
| SUPT20H       |
| RAPGEF2       |
| SERPINB1      |
| GRHL1         |
| RNY3          |
| EXOC7         |
| C6orf226      |
| KIAA0355      |
| GTF3A         |
| CNP           |
| DDX60L        |
| BRIP1         |
| HJURP         |
| CENPC         |
| CCDC61        |
| ATP2B4        |
| ZNF440        |
| SAMD1         |
| TMEM87B       |
| PLCXD2        |
| KIDINS220     |
| FKBPL         |
| CALU          |
| DTNBP1        |
| TMOD3         |
| RPS6KB2       |
| INPP5F        |
| TET2          |
| CTD-2311M21.4 |
| VPS36         |
| RP11-91120.2  |
| LONRF1        |
| PSMD4         |
| G6PC3         |
| USP8          |
| MCL1          |

|                        |
|------------------------|
| SUN1                   |
| LIPG                   |
| TM9SF3                 |
| HPS3                   |
| CNOT1                  |
| C19orf24               |
| QRICH1                 |
| ZNF224                 |
| PHF14                  |
| E2F6                   |
| INTS8                  |
| CHSY1                  |
| ACTN4                  |
| EIF5A                  |
| CACTIN                 |
| SRPK1                  |
| STEAP3                 |
| POLD2                  |
| SLC27A1                |
| RCBTB1                 |
| ATG14                  |
| SPOP                   |
| CNIH4                  |
| ESPL1                  |
| SEPW1                  |
| TRIM26                 |
| MEF2A                  |
| NDUFA10                |
| CANX                   |
| AK7                    |
| RAB28                  |
| JADE2                  |
| SRD5A3                 |
| XXYL1                  |
| XXbac-<br>BPG170G13.32 |
| PPP4C                  |
| DPH2                   |
| SDR39U1                |
| GTF2B                  |
| ZNF766                 |
| RICTOR                 |
| RCAN3                  |

|                  |
|------------------|
| EIF4EBP2         |
| PAPD4            |
| ZNF852           |
| MTFR1            |
| PREP             |
| MTO1             |
| HIBADH           |
| COQ10B           |
| BIN1             |
| HMGXB4           |
| UBTD2            |
| ATL3             |
| GLO1             |
| MALSU1           |
| LACE1            |
| BCLAF1           |
| XXyac-YX65C7_A.2 |
| USP22            |
| EIF3H            |
| ZNF644           |
| KDM5B            |
| RAP1B            |
| MTRF1L           |
| AC005592.2       |
| FANCE            |
| DCP1A            |
| C17orf62         |
| KIAA0232         |
| PDXK             |
| KCNH8            |
| PSEN2            |
| RNF26            |
| HSPBP1           |
| MED13            |
| MAPK1            |
| TJP2             |
| TRIM68           |
| ARSA             |
| NDUFS5           |
| PRDX3            |
| CTBS             |
| LEMD2            |
| MLLT1            |



|               |
|---------------|
| MED30         |
| NDUFB7        |
| TBCE          |
| BAG3          |
| MAN2A2        |
| MOV10         |
| HIST4H4       |
| MFSD5         |
| VAMP4         |
| TOR2A         |
| SIAE          |
| SMAD1         |
| INTS10        |
| CUX1          |
| HMGN2         |
| CCNYL1        |
| MED27         |
| CUEDC2        |
| SGMS1         |
| CHD8          |
| WIZ           |
| TMEM191A      |
| ZNF678        |
| RTTN          |
| RP5-1119A7.14 |
| CDH24         |
| PJA2          |
| KDEL1         |
| CYP20A1       |
| IRAK1BP1      |
| SLC31A2       |
| UBA3          |
| AHDC1         |
| TEAD3         |
| CREBRF        |
| BTRC          |
| ITGA6         |
| GPR156        |
| ERAP1         |
| HES1          |
| RBBP5         |
| ADSL          |
| SPC25         |

|           |
|-----------|
| COL1A1    |
| NEIL2     |
| GMCL1     |
| USP1      |
| CST9      |
| PREB      |
| PCTP      |
| ZNF490    |
| DHRS11    |
| MED1      |
| CD6       |
| ERI1      |
| GTF2I     |
| KIFC1     |
| EMC2      |
| KCTD3     |
| TRPM7     |
| SRP72     |
| PPP2R1A   |
| PTGES3    |
| SMAD3     |
| TRUB1     |
| HNRNPA2B1 |
| C19orf12  |
| CDC73     |
| ATRN      |
| LSR       |
| FBXO46    |
| CTTNBP2NL |
| DCTN4     |
| CITED2    |
| TMEM230   |
| ZHX3      |
| KDM3B     |
| TPX2      |
| MAPKAPK3  |
| LYPLA1    |
| GBF1      |
| STAT3     |
| RBM19     |
| LINC01183 |
| STK38L    |
| C17orf85  |

|               |
|---------------|
| IGSF8         |
| RHEBL1        |
| SIRT4         |
| ZMIZ2         |
| CENPA         |
| ETV3          |
| RP11-318A15.2 |
| ZUFSP         |
| CYB561        |
| RBM6          |
| NEK7          |
| DHX34         |
| AP2A1         |
| CHD9          |
| PSMA5         |
| HCG14         |
| OXSRI         |
| SRM           |
| ANGPTL6       |
| TRAF3IP2      |
| GATAD2A       |
| MRPS15        |
| POGK          |
| FNBP4         |
| ARF6          |
| DBF4B         |
| CNOT10        |
| BIRC2         |
| SEH1L         |
| MTHFD1L       |
| GHR           |
| ZNF784        |
| ATP1B1        |
| KLK10         |
| SLC2A4        |
| SNX1          |
| MAP4          |
| FBXO7         |
| ZNF775        |
| HBEGF         |
| CEP162        |
| ABL2          |
| TIPARP        |

|              |
|--------------|
| PLAUR        |
| RPL24        |
| SNRPD1       |
| LRFN3        |
| FADD         |
| CFAP36       |
| B4GALT2      |
| RAB12        |
| ZNF148       |
| SRBD1        |
| GORASP2      |
| ZMYND11      |
| DNAJB12      |
| SDHAF1       |
| LINC00282    |
| NFE2L3       |
| ZFYVE16      |
| ITPK1        |
| ETF1         |
| SLC38A9      |
| TAOK3        |
| ADAMTSL4-AS1 |
| PPP1R12C     |
| RNF216P1     |
| BCAS3        |
| OLFML3       |
| NUDT9        |
| TOP2B        |
| MRPL55       |
| DPF2         |
| RPL27        |
| DNAJC13      |
| MAGI3        |
| SKAP2        |
| UBXN2A       |
| RBM4B        |
| SHROOM3      |
| ITPRIP       |
| GDF5         |
| BUB1B        |
| PDLIM5       |
| TNFAIP8      |
| DAXX         |

|               |
|---------------|
| KLHL24        |
| CBX8          |
| BPGM          |
| COMMD9        |
| ZNF837        |
| SMUG1         |
| PHF1          |
| ZNF519        |
| IMPDH1        |
| CHCHD1        |
| ZBTB43        |
| KLHDC2        |
| RPL13A        |
| MORF4L1       |
| SLC39A14      |
| TADA1         |
| AHCYL1        |
| ADRB2         |
| C10orf76      |
| ST14          |
| CTD-2377D24.6 |
| UBB           |
| POC1A         |
| BIRC6         |
| FXD3          |
| PPIA          |
| GMFG          |
| NFKB2         |
| RASL11A       |
| METTL20       |
| PTPRG         |
| AHCYL2        |
| MICAL3        |
| PBX1          |
| DUSP5         |
| OCEL1         |
| THAP1         |
| IGSF9B        |
| MET           |
| MEX3B         |
| ZSCAN10       |
| AHSA2         |
| MARK4         |

|               |
|---------------|
| CYP26A1       |
| FRAT2         |
| ZNF202        |
| TIAL1         |
| RP11-156P1.3  |
| ADCK4         |
| DEF6          |
| GIP           |
| CACNA2D2      |
| FCER2         |
| MYOM3         |
| HNRNPUL1      |
| EXPH5         |
| ZNF805        |
| FER           |
| IPO8          |
| CIC           |
| PTPN21        |
| WDR47         |
| AC053503.4    |
| MARK2         |
| DNAJC15       |
| EFCAB12       |
| EBAG9         |
| RP11-278H7.4  |
| POU2F2        |
| SLC25A37      |
| CD83          |
| BCL6          |
| HUS1          |
| MBIP          |
| MIDN          |
| CACNA2D3      |
| ATAD5         |
| QSOX1         |
| TCEAL1        |
| STK40         |
| DGCR14        |
| RP11-190A12.9 |
| PPP2R5A       |
| SRL           |
| PERP          |
| C4orf3        |

|         |
|---------|
| ITGAE   |
| UBE3A   |
| ZNF614  |
| ZNF507  |
| NR5A2   |
| MIER2   |
| GCC2    |
| CCNY    |
| MN1     |
| SMURF2  |
| CMC1    |
| PODXL   |
| C2orf73 |
| NPAS1   |
| MME     |
| RTN1    |
| DRG2    |
| MUCL1   |
| SHOX2   |
| SEC61A1 |
| FSTL4   |
| HEATR1  |
| ADAM22  |
| ACP6    |
| SNRNP70 |
| CBLC    |
| ECE1    |
| COL12A1 |
| ATR     |
| SLC17A7 |
| SALL3   |
| FNBP1L  |
| ZFYVE27 |
| SYDE1   |
| USP18   |
| CBFB    |
| POPDC3  |
| CSRNP3  |
| RANBP17 |
| WNT9B   |
| STAC2   |
| ZNF256  |
| CSMD3   |

|               |
|---------------|
| LOX           |
| CLYBL         |
| LRIG3         |
| ATIC          |
| TMC8          |
| PDGFRL        |
| NBR1          |
| DOK7          |
| RP11-209K10.2 |
| TM6SF1        |
| NEUROD2       |
| RPL39L        |
| MOCS1         |
| EVL           |
| AKR1B10       |
| HMSD          |
| TRIM56        |
| GALNT7        |
| CLN5          |
| IMPA2         |
| WDR59         |
| EHMT2         |
| GNAI1         |
| CNIH3         |
| APBB2         |
| SYT14         |
| RP11-95M5.1   |
| CARS          |
| RMDN3         |
| PACSIN2       |
| BPIFB1        |
| ATP6V1E2      |
| NOSTRIN       |
| EBF3          |
| FBXO17        |
| NCF4          |
| CDH23         |
| RP11-433J22.3 |
| TPD52         |
| ANO4          |
| GFPT2         |
| SLC17A6       |
| ITGB2         |



|               |
|---------------|
| MYO9B         |
| RPS15         |
| GAD2          |
| GOLM1         |
| AKAP7         |
| PKN1          |
| ANO5          |
| RBM24         |
| LCK           |
| CUX2          |
| C10orf67      |
| FBXL2         |
| RGS4          |
| CDC42EP1      |
| KIF19         |
| SSBP3         |
| NDFIP1        |
| VTRNA1-2      |
| FKBP14        |
| NRP1          |
| DPH6-AS1      |
| PLA2G3        |
| RN7SL208P     |
| RCC1          |
| APC2          |
| ZC3HAV1L      |
| SMEK1         |
| FHIT          |
| CTD-2319I12.3 |
| KCNK2         |
| C1orf127      |
| RP11-180P8.1  |
| MIR4458HG     |
| PXK           |
| LINC01158     |
| B4GALNT4      |
| ADCY4         |
| SORBS2        |
| LPAR5         |
| RP11-467N20.7 |
| SLC5A1        |
| NKIRAS2       |
| EMILIN3       |

|              |
|--------------|
| ACTL8        |
| TGOLN2       |
| SRA1         |
| SULT2B1      |
| AGTR1        |
| NEUROG1      |
| ZNF311       |
| CSMD1        |
| LINC01299    |
| RBM47        |
| CHST7        |
| TULP3        |
| CNRIP1       |
| MAF          |
| ADCY3        |
| CABLES1      |
| MMEL1        |
| AC084262.2   |
| KATNAL2      |
| MIRLET7BHG   |
| ZNF354C      |
| RP11-169E6.4 |
| RP5-912113.1 |
| FOXE3        |
| F2           |
| HDAC5        |
| PALMD        |
| AOC4P        |
| CNPY1        |
| EGR4         |
| C6orf99      |
| UROD         |
| SLITRK3      |
| NWD1         |
| PCLO         |
| PDIA5        |
| ESRP2        |
| BRMS1L       |
| HSD17B13     |
| RYR1         |
| POU2F3       |
| NDST4        |
| ATP5G2       |

|              |
|--------------|
| LRRC7        |
| ERN1         |
| INSM2        |
| EMX1         |
| TECPR2       |
| LUC7L3       |
| ADCYAP1R1    |
| CLDN4        |
| TMEM51       |
| TTC33        |
| GRIK5        |
| PTBP1        |
| PAK7         |
| CDPF1        |
| SNX31        |
| SKOR1        |
| GPATCH4      |
| SCARA5       |
| SH3TC2       |
| ANXA2        |
| RASGRP2      |
| FOXP1        |
| OSBPL10      |
| INPP4B       |
| NKX3-1       |
| STMN4        |
| FILIP1       |
| FIGN         |
| NCKAP1       |
| CDK15        |
| CTSH         |
| DFNB31       |
| COMP         |
| TMTC1        |
| IZUMO2       |
| PPP5D1       |
| RP11-65F13.3 |
| LINC00910    |
| HRC          |
| XYL2         |
| CETP         |
| ME3          |
| GARS         |

|              |
|--------------|
| DIP2C        |
| DIRC3        |
| RNA5SP40     |
| PLEKHG4B     |
| GP2          |
| DOC2B        |
| RMND5B       |
| CBX7         |
| ALG14        |
| SCTR         |
| ZNF536       |
| CALD1        |
| MUC5B        |
| FRMD4A       |
| RP11-230G5.2 |
| UPF1         |
| RP11-462L8.1 |
| PRR16        |
| GFRA1        |
| CCDC12       |
| SLC22A2      |
| LASP1        |
| VPS13D       |
| HS3ST3B1     |
| RASL11B      |
| RP11-346L1.2 |
| MANSC4       |
| IFI35        |
| BICC1        |
| NANOS2       |
| RPS26P49     |
| CASZ1        |
| MBTPS1       |
| SLC9A2       |
| CWH43        |
| HTR1E        |
| OLFM3        |
| 44447        |
| TENM4        |
| SLC25A21     |
| EDAR         |
| MCU          |
| LINC00483    |

|               |
|---------------|
| HS3ST4        |
| LRRCC1        |
| KCNJ6         |
| PDE6B         |
| RP11-734K2.4  |
| GRIK2         |
| COL14A1       |
| PAX7          |
| MT2A          |
| PRKG1-AS1     |
| CSMD2         |
| KCNJ8         |
| MEX3D         |
| LHX2          |
| LILRA1        |
| CACNA1F       |
| KIF6          |
| FRZB          |
| MAP4K4        |
| NKX2-8        |
| TLL1          |
| STAB1         |
| PRKG1         |
| RP11-174G6.1  |
| CDA           |
| STC2          |
| KIF17         |
| MORN1         |
| RDH8          |
| PDE1C         |
| NMRK2         |
| SH3BP4        |
| HAMP          |
| PAX2          |
| AOC3          |
| RP11-170M17.1 |
| KCNJ11        |
| RIPK1         |
| METTL11B      |
| PLXNB1        |
| CPAMD8        |
| MDFIC         |
| CCDC126       |

|               |
|---------------|
| PRAMEF11      |
| AC011286.1    |
| KIAA1683      |
| NIT2          |
| ARHGAP36      |
| NUPR1         |
| SDC4          |
| NAALAD2       |
| ISLR2         |
| WNT7A         |
| EFCAB2        |
| PADI3         |
| COASY         |
| PPM1L         |
| GALNTL6       |
| LHX4          |
| WSCD1         |
| CEP85L        |
| CTC-537E7.2   |
| RIOK3         |
| FAIM3         |
| SNTG1         |
| SMCR8         |
| SLC27A4       |
| EOMES         |
| LDHD          |
| FOXI1         |
| CCDC33        |
| LIN28A        |
| ARHGAP12      |
| MAGI2         |
| NTM           |
| LINC00634     |
| ANKRD34C-AS1  |
| HS3ST2        |
| FOXA2         |
| FOXG1-AS1     |
| AP001347.6    |
| CD40          |
| RP11-520P18.5 |
| PROB1         |
| ZNF324        |
| PPP2CB        |

|               |
|---------------|
| COPZ2         |
| HBM           |
| LSP1          |
| LRRC71        |
| MYL7          |
| GCFC2         |
| TMEM184A      |
| VNN3          |
| FAM19A2       |
| GULOP         |
| AGBL4         |
| RELB          |
| CCL28         |
| EZR           |
| MYT1          |
| EBF1          |
| ADCY6         |
| RP11-158J3.2  |
| ZNF804B       |
| FGF8          |
| KLK11         |
| GUCY1A2       |
| AKR7L         |
| RP11-1220K2.2 |
| PLCH1         |
| PLA2G2E       |
| RGR           |
| KCNK12        |
| CSF1R         |
| SLC27A5       |
| SLC16A7       |
| ADRA1B        |
| GPR149        |
| IGFBP6        |
| CKAP2L        |
| UCN3          |
| GCNT3         |
| MATK          |
| RNF128        |
| RP11-13J10.1  |
| MSLN          |
| FAM46A        |
| NFASC         |

|               |
|---------------|
| SRPK3         |
| HIVEP3        |
| MAST4         |
| TPO           |
| ZSWIM4        |
| AJ003147.9    |
| ITGB7         |
| PCYT2         |
| C2orf40       |
| ERICH1-AS1    |
| ANK1          |
| ZNF350        |
| TMEM190       |
| TMIE          |
| FADS6         |
| WDFY3         |
| RALA          |
| C1orf229      |
| LINC00511     |
| AUTS2         |
| ZNF880        |
| TRIM29        |
| CTD-2207P18.2 |
| KBTBD11-OT1   |
| RPS5          |
| IRX4          |
| DOK6          |
| DNAI1         |
| FFAR2         |
| SYN3          |
| PSMG3         |
| RP11-19E11.1  |
| DNER          |
| FAM71E1       |
| LHX5          |
| TTF2          |
| PRDM16        |
| PLOD2         |
| KLC3          |
| SLC38A10      |
| EPHA10        |
| CPNE4         |
| RP11-413P11.1 |



|               |
|---------------|
| RSPO3         |
| RP11-324C10.1 |
| RIN3          |
| ATAD3C        |
| TRIM67        |
| ANGPT4        |
| SYBU          |
| SLC6A1        |
| OCIAD2        |
| NLK           |
| RP11-202A13.1 |
| FAM167A       |
| MUC13         |
| CEACAM20      |
| LGALS4        |
| PCSK4         |
| RP11-410D17.2 |
| ADCY7         |
| CLDN5         |
| PRDM14        |
| BNIP3         |
| CDH8          |
| RP11-624M8.1  |
| RP11-148L24.1 |
| AKAP12        |
| EXOC3L1       |
| C5orf66       |
| GABRA1        |
| ABLIM1        |
| RSPO1         |
| SPACA3        |
| ARHGAP20      |
| SFMBT2        |
| AC073343.13   |
| RP11-353N14.5 |
| CTD-2281E23.2 |
| KRT5          |
| SLC45A3       |
| ANKRD24       |
| KIAA1211L     |
| LINC01342     |
| RP11-1049H7.2 |
| MUC4          |

|                |
|----------------|
| PTH1R          |
| ANKDD1B        |
| ANKFN1         |
| ANKRD34B       |
| SYT6           |
| MMP2           |
| SDK1           |
| CCR7           |
| NOVA2          |
| KLK1           |
| BRINP3         |
| FGFBP1         |
| RP11-46C24.3   |
| RP11-1263C18.1 |
| NEGR1          |
| SLC2A1         |
| PLCD3          |
| C1QL2          |
| KCNV1          |
| DPYSL4         |
| IL1R1          |
| CRIM1          |
| COX7A2L        |
| GUCA2B         |
| PSD            |
| SLC13A3        |
| SCRN2          |
| TMEM132E       |
| TJP3           |
| RIPPLY2        |
| ZNF677         |
| OSBPL2         |
| GABRD          |
| KCNJ9          |
| HMX2           |
| PITX2          |
| RP11-305P22.9  |
| PITPNM2        |
| VWA3B          |
| HLCS           |
| BTNL8          |
| KLK4           |
| TNNI1          |

|             |
|-------------|
| MYO3A       |
| HCRTR1      |
| GRP         |
| CPLX2       |
| EML1        |
| PHYHIP      |
| ARID1B      |
| ZBTB16      |
| TDRD1       |
| NCL         |
| COL22A1     |
| IFT81       |
| SORBS3      |
| SDR16C5     |
| KCNS3       |
| SLC18A1     |
| ZFP82       |
| LINC01107   |
| TCHH        |
| C1orf86     |
| TRPM3       |
| UBXN4       |
| CTB-35F21.1 |
| TARID       |
| DOCK5       |
| OPCML       |
| MYOD1       |
| HCK         |
| C14orf105   |
| CNTN4       |
| LHX1        |
| VGFB        |
| CADPS       |
| CHRDL2      |
| SLN         |
| GIPC1       |
| SLITRK1     |
| B3GALNT2    |
| ZNF503-AS1  |
| GYS1        |
| LINC01163   |
| NOBOX       |
| CLDN11      |

|               |
|---------------|
| CHRNA7        |
| P2RX2         |
| SST           |
| ERICH3        |
| PGD           |
| FAM162B       |
| ZNF300P1      |
| TMPRSS13      |
| S100A14       |
| FAM159B       |
| RIMS3         |
| POLD3         |
| VSTM4         |
| GSR           |
| SPON2         |
| CHAT          |
| MATN3         |
| RGS20         |
| ZNF43         |
| RNF43         |
| LINC01411     |
| NRCAM         |
| CNGB1         |
| HLA2          |
| SPON1         |
| SORCS2        |
| ARPP21        |
| DAP3          |
| CCDC40        |
| NUMBL         |
| GDF10         |
| MYOM2         |
| TBC1D5        |
| SLC6A19       |
| PODNL1        |
| KB-1980E6.3   |
| SP6           |
| MICALCL       |
| PRDM13        |
| RP11-396O20.1 |
| NATD1         |
| SYNDIG1       |
| RABEP1        |

|             |
|-------------|
| TRABD2B     |
| IL27        |
| OLFM2       |
| ADAMTS13    |
| KIF22       |
| RP11-32K4.1 |
| AKR1D1      |
| NUDT18      |
| ULBP3       |
| RAB11FIP1   |
| ARHGAP27    |
| PDE6G       |
| L3MBTL1     |
| CALML6      |
| SULT4A1     |
| NLRP1       |
| DNAH9       |
| HLA-DOA     |
| ARHGEF1     |
| LPHN2       |
| DNAI2       |
| DMRTA2      |
| NPPB        |
| RASGEF1A    |
| CTSB        |
| LAD1        |
| CYFIP2      |
| RBPM2       |
| NCAN        |
| BHLHE23     |
| ZSCAN18     |
| RPH3A       |
| AC005062.2  |
| APEH        |
| CARTPT      |
| IL17REL     |
| TCF24       |
| MEI1        |
| GPR6        |
| SLIT2       |
| PLEKHG4     |
| CELF5       |
| AC022431.2  |

|              |
|--------------|
| PRKD1        |
| KLB          |
| SECTM1       |
| NPAS3        |
| VENTX        |
| AC005597.1   |
| SLC32A1      |
| RP11-343J3.2 |
| MAOB         |
| MYL4         |
| SPATA41      |
| BARX2        |
| SLC26A5      |
| LINC00599    |
| MDK          |
| KAZN         |
| XYL1         |
| ELFN1        |
| NMNAT3       |
| SLC22A31     |
| PHF21B       |
| KRT19        |
| DAB1         |
| ABR          |
| HIF3A        |
| CDH5         |
| AC124861.1   |
| NPR3         |
| GUSB         |
| STK32C       |
| ZNF568       |
| LAMC2        |
| THADA        |
| TFAP2D       |
| FSTL3        |
| CHD5         |
| TMEM52       |
| SRRM4        |
| MOS          |
| C20orf203    |
| ARID5A       |
| FAM172A      |
| INTS1        |

|                |
|----------------|
| ZNF471         |
| CTXN3          |
| EPPK1          |
| RP11-561N12.5  |
| HMGCS2         |
| TSLP           |
| CACNA1C        |
| AP000997.2     |
| DLGAP3         |
| NDUFA4L2       |
| KCTD16         |
| CROCC          |
| LAMA2          |
| DLX6-AS1       |
| STK32B         |
| ASPG           |
| GPD1L          |
| GRIN2D         |
| ADAMTS2        |
| LINC01097      |
| RP11-115J16.1  |
| RP11-99J16_A.2 |
| UMAD1          |
| RP4-668J24.2   |
| SLC6A20        |
| LINC00535      |
| RP11-457M11.6  |
| TMEM63A        |
| PNPLA7         |
| KCP            |
| GSC            |
| CYP2E1         |
| FAM101A        |
| HYDIN          |
| ALX4           |
| CTD-2582D11.1  |
| CREB3L1        |
| CTRC           |
| TSC22D2        |
| STAU2          |
| GRID1          |
| RP11-497G19.3  |
| NUPR1L         |

|              |
|--------------|
| LRRRC73      |
| LHX3         |
| RP11-11112.1 |
| FAM92B       |
| ATP11AUN     |
| TMEM45B      |
| KDR          |
| ANXA4        |
| SHISA9       |
| ZNF282       |
| IGFBP4       |
| ZIK1         |
| FURIN        |
| BTBD17       |
| NHSL1        |
| CD164L2      |
| PSD3         |
| TTC39A       |
| DPCR1        |
| RP11-81K2.1  |
| MOGAT2       |
| TRPM8        |
| GPR37L1      |
| TBX5         |
| WIF1         |
| C1QL1        |
| GYPE         |
| B4GALT7      |
| NRXN2        |
| TAS1R3       |
| VSX2         |
| SHANK1       |
| MPP7         |
| PNLIPRP2     |
| KIAA1217     |
| ABI1         |
| NXPH1        |
| GBAS         |
| CLSTN1       |
| UNCX         |
| SEC14L3      |
| SLC12A5      |
| CDH18        |



|            |
|------------|
| SAG        |
| LFNG       |
| ADCY5      |
| DUSP4      |
| CBFA2T3    |
| PLXNA2     |
| TCF7L2     |
| CDH16      |
| B3GNT7     |
| IRX2       |
| TBC1D9B    |
| LRRN2      |
| ZNF418     |
| ASIC2      |
| LARP1      |
| OTX2       |
| SPAG6      |
| SHBG       |
| EMX2OS     |
| SYN2       |
| HNRNPU     |
| HCRT       |
| PCDH8      |
| EFHD2      |
| ST6GALNAC5 |
| OTX2-AS1   |
| HCG21      |
| TPTEP1     |
| DPY19L1P1  |
| CDH13      |
| SSPO       |
| HEPACAM    |
| ARHGEF12   |
| SLC7A9     |
| EN1        |
| RNASE1     |
| MEGF6      |
| ZBTB7A     |
| BEST4      |
| TRPS1      |
| ENTPD8     |
| AATK       |
| TBX15      |

|               |
|---------------|
| DCC           |
| SUN3          |
| CNR1          |
| OSBPL1A       |
| ACAN          |
| OBSCN         |
| RP11-545A16.3 |
| ATP1A3        |
| RP1-117O3.2   |
| SERINC2       |
| SHF           |
| ANPEP         |
| FAM132A       |
| TLX1NB        |
| BAHCC1        |
| RP11-177H2.1  |
| USP36         |
| SNED1         |
| C9orf3        |
| ESX1          |
| MECOM         |
| SYNC          |
| GALNT15       |
| TMEM105       |
| CARD14        |
| BMP4          |
| PHOX2B        |
| NAV1          |
| ST6GAL2       |
| TP73          |
| ITGA8         |
| SNCB          |
| GAD1          |
| GALR1         |
| CEP112        |
| FGFR1         |
| AC096772.6    |
| AC007796.1    |
| RP11-451B8.1  |
| NUAK1         |
| TMEM196       |
| BAMBI         |
| REEP4         |

|              |
|--------------|
| HADHB        |
| DPEP1        |
| ROBO3        |
| CDH2         |
| MIR124-2HG   |
| AEBP2        |
| CCDC102A     |
| SLC35G5      |
| SLC6A2       |
| CHST8        |
| FZD9         |
| WDR86        |
| SVOPL        |
| TMPRSS3      |
| GRHL2        |
| CELF2        |
| ZFP42        |
| ASAP2        |
| CPXM2        |
| GABRG2       |
| ONECUT1      |
| KCNC4        |
| RP11-20G13.1 |
| SFRP1        |
| FAM129A      |
| ONECUT3      |
| KRT6A        |
| CAPN5        |
| PGLYRP4      |
| ADAMTS14     |
| PLA2G2F      |
| INA          |
| SCAMP5       |
| LAMC3        |
| DMTN         |
| ZFP41        |
| LRRTM4       |
| BFSP1        |
| ARHGEF4      |
| PROKR2       |
| ZNF704       |
| VWA5B1       |
| SDE2         |

|               |
|---------------|
| RP11-718O11.1 |
| FGF5          |
| LIN9          |
| TLX3          |
| RP11-522B15.3 |
| EYA4          |
| LINC00682     |
| PCK1          |
| PHOX2A        |
| KCNMA1        |
| RP5-1180C18.1 |
| COL23A1       |
| UBE2QL1       |
| RP5-884C9.2   |
| NPAS2         |
| SMG7          |
| ATP8B1        |
| MALL          |
| AMN           |
| PYCARD        |
| CHGA          |
| USH1G         |
| CCDC88C       |
| NANOS3        |
| PROSC         |
| SMIM1         |
| CHST12        |
| BARHL2        |
| AHNAK         |
| VAX1          |
| LTBP4         |
| CTCF          |
| HK3           |
| CRB2          |
| GPR39         |
| CHST2         |
| HOXD10        |
| DPYS          |
| VAX2          |
| EFNA5         |
| ADARB2        |
| ASCL4         |
| SLC2A14       |

|               |
|---------------|
| GGH           |
| RNF220        |
| AC079135.1    |
| GDF7          |
| ARHGAP26      |
| AGPAT3        |
| ZC3H14        |
| AP1S3         |
| LBP           |
| IGF2BP3       |
| AQPEP         |
| LINC01169     |
| PACRG         |
| HHIPL1        |
| NAT8L         |
| RBFOX1        |
| FLT4          |
| BBS2          |
| IQSEC1        |
| C1orf141      |
| IL12A-AS1     |
| CD34          |
| LINC00925     |
| PXT1          |
| HTR2C         |
| PPFIA4        |
| HPX           |
| ARL15         |
| KCNT1         |
| UPP1          |
| TRH           |
| NRXN1         |
| DOK2          |
| C1orf204      |
| SOST          |
| DOK3          |
| SLC24A4       |
| RYR2          |
| PODXL2        |
| RP11-54O7.16  |
| D4S234E       |
| RP11-328K15.1 |
| MSMB          |

|               |
|---------------|
| TIAM2         |
| NR2F1-AS1     |
| ANTXR1        |
| BCAT2         |
| ERG           |
| RP11-700P18.1 |
| RP11-964E11.2 |
| CENPL         |
| CLNK          |
| STMN2         |
| FENDRR        |
| RP11-135A1.3  |
| CACNB3        |
| GDF3          |
| CTB-57H20.1   |
| C6            |
| CTD-2666L21.1 |
| RP11-65D24.2  |
| BMPER         |
| RP11-385M4.3  |
| PIP5K1C       |
| ADAMTS12      |
| SCNN1D        |
| CRTAC1        |
| PLXNA4        |
| CAMK4         |
| GLYATL2       |
| ZIC1          |
| PTPRN2        |
| SLC35F4       |
| AC009501.4    |
| GLI3          |
| FGD5P1        |
| ZBED9         |
| PHF21A        |
| UNC5A         |
| ZNF350-AS1    |
| COPS5         |
| BFSP2         |
| IGDCC4        |
| NXPB2         |
| UNC5D         |
| TEKT5         |

|               |
|---------------|
| TFAP2A        |
| CATSPERG      |
| MAPT          |
| OR2I1P        |
| SYNDIG1L      |
| KCTD9         |
| TRPC5         |
| NCR1          |
| KIF26B        |
| SLC9A3        |
| ZNF702P       |
| LDLRAD2       |
| OR2G6         |
| UBR4          |
| TUBGCP3       |
| PAX6          |
| CD247         |
| TTC6          |
| RNA5SP174     |
| CMTM2         |
| FHL1          |
| MEST          |
| STK3          |
| DPPA5         |
| ESPNP         |
| CCDC170       |
| SIX3          |
| CTD-2314G24.2 |
| ATP10A        |
| NPHS1         |
| CACNA1G       |
| RP11-10N16.3  |
| CLMN          |
| TBC1D8        |
| ITPR1-AS1     |
| PRRX1         |
| HAPLN3        |
| CTD-2357A8.3  |
| RP4-665J23.1  |
| TAF7L         |
| GALK1         |
| KBTBD11       |
| GHRHR         |

|               |
|---------------|
| HCG27         |
| SEC14L1       |
| SPATA21       |
| ACTR5         |
| RP11-317F20.3 |
| GFAP          |
| TMEM175       |
| GRM6          |
| BSND          |
| CASC18        |
| ZNF550        |
| CHADL         |
| FUT2          |
| C1S           |
| FAM71F1       |
| GALNS         |
| LINC01551     |
| ST3GAL3       |
| P4HA3         |
| IGLON5        |
| TTC34         |
| RGL3          |
| UBE2O         |
| PDPN          |
| SLC25A27      |
| ZDHHC21       |
| KIAA1462      |
| TGFB2         |
| CNIH1         |
| ROR1          |
| ST6GAL1       |
| LINC00265     |
| DPF3          |
| KCNAB2        |
| TXNRD2        |
| DMRT3         |
| FARSA         |
| CUEDC1        |
| C15orf27      |
| RP11-299H22.3 |
| C1orf162      |
| ZBTB20        |
| SLC45A4       |



|               |
|---------------|
| MURC          |
| AC011516.2    |
| IQCH          |
| ELK1          |
| GFPT1         |
| WNK4          |
| FGF12         |
| RP11-649A16.1 |
| GAPT          |
| FMN2          |
| SLC10A6       |
| FAM189A1      |
| TRIM60        |
| CARD11        |
| ECEL1         |
| ZFP57         |
| RP11-753D20.1 |
| PHACTR2       |
| KRT27         |
| PVT1          |
| RP11-26L20.3  |
| SEMA4B        |
| S1PR1         |
| DPYSL3        |
| SNAI3-AS1     |
| ZIC4          |
| SESN2         |
| MCM5          |
| CTBP1         |
| RSPH6A        |
| HECW1         |
| WNT11         |
| SAMD4A        |
| TAF15         |
| AGR3          |
| CA3           |
| SLC2A2        |
| MIR662        |
| D2HGDH        |
| TARS          |
| NFATC1        |
| OTOP3         |
| ENGASE        |

|               |
|---------------|
| LINC00111     |
| TBX20         |
| XKR6          |
| CLU           |
| IKZF2         |
| RPTOR         |
| SEMA6B        |
| FSCN1         |
| NDFIP2        |
| HEPHL1        |
| PIAS1         |
| TDRP          |
| LRRIQ4        |
| ERCC1         |
| ZC3H11B       |
| DLC1          |
| UPB1          |
| LINC01060     |
| PRSS36        |
| KPNA6         |
| PPP1R13L      |
| PTPRG-AS1     |
| SALL1         |
| HSPB8         |
| PPP1R36       |
| GMDS          |
| OTP           |
| NR4A3         |
| CALN1         |
| GRB10         |
| RPL35P4       |
| TWIST1        |
| HMGA2         |
| WDFY4         |
| ARHGAP24      |
| RP11-108O10.2 |
| FAM221A       |
| NXN           |
| KCTD15        |
| MS4A15        |
| NOTCH3        |
| HLA-C         |
| ABHD17C       |

|               |
|---------------|
| POP1          |
| ALX1          |
| SLC6A5        |
| GLP1R         |
| EPB42         |
| RTN4          |
| DLGAP2        |
| PRLH          |
| RIC8B         |
| C7orf31       |
| SLC5A9        |
| USP42         |
| ARHGAP22      |
| EDNRA         |
| HDAC4         |
| RAD51B        |
| ERMAP         |
| DTX1          |
| RP11-622C24.2 |
| ZCCHC11       |
| TMC6          |
| PDP1          |
| AMICA1        |
| TG            |
| PRUNE2        |
| CIB2          |
| BICD2         |
| SATB2         |
| NEK10         |
| SMPD3         |
| MGMT          |
| ARHGEF10      |
| MINA          |
| ZBTB17        |
| IL20RA        |
| CLUL1         |
| ATP8B4        |
| MAN1C1        |
| NEK1          |
| TMEM237       |
| C16orf95      |
| DNAJC22       |
| PXDN          |

|               |
|---------------|
| CACNA1A       |
| ATP6V0E2-AS1  |
| SYNPO         |
| TSPAN18       |
| ANK2          |
| CACNA1I       |
| LINC00402     |
| UQCRHL        |
| BAK1P2        |
| GREM2         |
| SLCO3A1       |
| ANK3          |
| LTF           |
| ZNF528        |
| DST           |
| MTSS1         |
| RP11-503C24.4 |
| PEAR1         |
| CD40LG        |
| SPEG          |
| FTO           |
| FAM187B       |
| MSANTD2       |
| SNX29         |
| NEURL1B       |
| SFRP2         |
| FNDC3B        |
| NDUF6F6       |
| ANKRD11       |
| LRRC74A       |
| DNAJC18       |
| BRAP          |
| ZNF596        |
| DENND5B       |
| LCT           |
| GP1BA         |
| GFOD1         |
| GP9           |
| SLC5A7        |
| LBH           |
| KCNMB3        |
| NSD1          |
| MEIS1         |

|               |
|---------------|
| LGALS7        |
| AK4           |
| FAM216B       |
| TRIML2        |
| PRRT1         |
| SUV420H2      |
| TBC1D16       |
| RP11-1E1.2    |
| C11orf97      |
| SLC25A3P1     |
| APLP2         |
| RD3           |
| RP11-227F19.1 |
| LINC01033     |
| FAM160B1      |
| COX6C         |
| RPL22L1       |
| RASAL1        |
| CAPZB         |
| PANK4         |
| SNRPN         |
| RTKN2         |
| SLC9A1        |
| CYTH3         |
| EPHA4         |
| SP8           |
| MYH14         |
| ECHDC2        |
| GSTO2         |
| TTL10         |
| LINC01138     |
| LINC01210     |
| MPP5          |
| INPP5J        |
| ALS2CL        |
| PPP2R5B       |
| ZNF343        |
| WWOX          |
| PTGER4        |
| SPRYD7        |
| FAM47E-STBD1  |
| DGKH          |
| TBATA         |

|              |
|--------------|
| SLC17A2      |
| GDF6         |
| LINC01250    |
| NECAB1       |
| C14orf37     |
| KDM1B        |
| 44450        |
| RPS6KA2      |
| PTPRA        |
| LIN7C        |
| RP11-298I3.1 |
| SLC18B1      |
| AKAP13       |
| ATP2B1       |
| ZFYVE28      |
| SMYD1        |
| CFAP46       |
| P2RX3        |
| SC5D         |
| MYO1C        |
| FAM53A       |
| TNFRSF10B    |
| TREM1        |
| SRGAP3       |
| METAP1D      |
| LMF1         |
| ARHGEF16     |
| SHCBP1L      |
| SLC25A48     |
| SLC1A2       |
| HOXB1        |
| KIAA1644     |
| RGS12        |
| IL5          |
| MPRIP        |
| PEX11A       |
| ABCA2        |
| MACROD1      |
| MIR331       |
| LPCAT1       |
| C5orf47      |
| RBPJ         |
| ISM2         |

|               |
|---------------|
| GUCY1B2       |
| MRPL48        |
| FYTTD1        |
| CCDC73        |
| MYO7A         |
| RP11-403I13.5 |
| JRK           |
| KIF21B        |
| KLF12         |
| PRKCE         |
| NEU2          |
| FAM20C        |
| CLK4          |
| AP000255.6    |
| HOPX          |
| MYOZ3         |
| JAKMIP3       |
| FCGRT         |
| LARP4B        |
| C2orf43       |
| FOXP3         |
| KLHDC4        |
| RGS3          |
| RP4-680D5.2   |
| TNIK          |
| AP2A2         |
| PLEKHG1       |
| SMOC2         |
| SYCP2         |
| RP11-973N13.2 |
| NEU1          |
| PCDH8P1       |
| GALNT1        |
| RIMBP2        |
| RAB11FIP4     |
| PIK3R2        |
| HEATR4        |
| PDE4C         |
| TLX2          |
| RP11-545A16.4 |
| BCL2L12       |
| BBX           |
| GPC6          |

|           |
|-----------|
| KCNS1     |
| ACSF3     |
| HOXC4     |
| TCF20     |
| RPS14     |
| EP400     |
| C6orf136  |
| UBE3D     |
| CDCA2     |
| STK19     |
| DCAKD     |
| RNA5-8SP2 |
| NBAS      |
| EPHB4     |
| ZSCAN12P1 |
| AGPAT4    |
| ARPC1B    |
| IGFBP2    |
| ASCC2     |
| PPP1R13B  |
| AGAP1     |
| RBX1      |
| GPR137    |
| CXXC5     |
| CHCHD3    |
| SMYD3     |
| ZDHHHC14  |
| MYO3B     |
| RNF165    |
| ACTR1B    |
| IST1      |
| SERPINE3  |
| CTU1      |
| H2BFWT    |
| CHFR      |
| SKIV2L    |
| RBM5      |
| PASK      |
| CSTL1     |
| PFKFB3    |
| TMC7      |
| ERICH1    |
| PPP2R2D   |



|               |
|---------------|
| FAM3A         |
| ERGIC1        |
| ZCCHC14       |
| IZUMO1        |
| GOT2          |
| CAMKK1        |
| DCTD          |
| TTC7B         |
| PTPN14        |
| GRAMD4        |
| GPX5          |
| SCAPER        |
| MCF2L2        |
| NCOR2         |
| RING1         |
| AC073869.20   |
| ZNRD1-AS1     |
| RP11-241120.4 |
| UNC93A        |
| LDB3          |
| KCNG2         |
| NPC1L1        |
| CTD-2277K2.1  |
| ANKRD9        |
| BOLA1         |
| TNFRSF1B      |
| JUP           |
| BRMS1         |
| FOXN3         |
| ANKRD33B      |
| GSKIP         |
| DOCK1         |
| TAF4          |
| OGFOD3        |
| DNAJC16       |
| OTUD7B        |
| GPN1          |
| IKZF3         |
| INPP5A        |
| ZNF865        |
| VTI1A         |
| GRAPL         |
| IFT140        |

|             |
|-------------|
| PALLD       |
| NADSYN1     |
| ECHS1       |
| SDHA        |
| CCDC92      |
| TUBGCP2     |
| FGFR2       |
| TBCD        |
| AC005077.14 |
| CCAR2       |
| PRKAG2      |
| TPD52L2     |
| EIF3B       |
| ZNF688      |
| CYTH1       |
| BANP        |
| GSE1        |
| MTSS1L      |
| FOXK1       |
| KLRD1       |
| AC009963.6  |
| C3          |
| TMEM201     |
| ZFP92       |
| AGO2        |
| B3GNT3      |
| CLIP2       |
| OIT3        |
| ILVBL       |
| WDR88       |
| HTT         |
| CSNK1G2     |
| MAD1L1      |
| HERC2       |
| PARD3       |
| SRD5A1      |
| IFFO1       |
| PEX5        |
| LRPAP1      |
| VPS53       |
| TAOK2       |
| LMNA        |
| CYFIP1      |

|               |
|---------------|
| USP20         |
| WRAP73        |
| ZNF516        |
| SGTA          |
| RELT          |
| TSC2          |
| ARMC5         |
| 44448         |
| HDGFRP2       |
| PAOX          |
| MYO15A        |
| DGKQ          |
| GAK           |
| CTDP1         |
| KRBA1         |
| C7orf50       |
| MTHFSD        |
| CARS2         |
| JAG2          |
| GRK7          |
| METTL22       |
| KIAA1549      |
| ARHGEF10L     |
| TFDP1         |
| ZC3H18        |
| NRBP2         |
| PACS2         |
| PCNXL2        |
| LRP1          |
| JARID2        |
| ATP11A        |
| PLXNA1        |
| TRIM35        |
| SCAP          |
| KDM4B         |
| SPSB1         |
| RP11-215H18.5 |
| KLHL29        |
| SCRIB         |
| NDRG1         |
| LMAN2         |
| SRRM2         |
| SPATA5        |

|          |
|----------|
| SH3BP5L  |
| ADCY10P1 |
| KLHL36   |
| ACIN1    |
| TYK2     |

**Supplementary Table 1.** List of 2454 DMGs.

|          |
|----------|
| Genes    |
| IL36A    |
| TPTE     |
| FABP12   |
| ZFP42    |
| OR9A4    |
| RAG2     |
| ZNF729   |
| SLCO6A1  |
| GABRG1   |
| FGF3     |
| PRB1     |
| OR2H1    |
| PRSS56   |
| C20orf85 |
| PROP1    |
| NTSR2    |
| C1QTNF8  |
| SLC22A8  |
| PRB2     |
| CCDC166  |
| PATE4    |
| TFAP2B   |
| LHX3     |
| OR1Q1    |
| CGA      |
| TRHR     |
| PVALEF   |
| LHX1     |
| IFNK     |
| CEACAM20 |
| OTOP2    |
| CSMD3    |
| STMND1   |
| PRSS37   |
| RNF222   |
| WT1      |
| OOEP     |
| TBR1     |
| MYBPH    |
| LCT      |
| SLC25A52 |
| PPP1R27  |

|           |
|-----------|
| SLC28A1   |
| PYY       |
| SLC30A10  |
| NLRP9     |
| TMEM269   |
| CA1       |
| TP53AIP1  |
| SLC22A14  |
| C7orf57   |
| PSORS1C2  |
| TMEM190   |
| VIP       |
| SPAG17    |
| SMIM35    |
| CASC1     |
| GNG4      |
| M1AP      |
| DLGAP1    |
| TLX2      |
| CEACAM4   |
| GALR2     |
| ANGPTL3   |
| HIST1H2BF |
| TTYH1     |
| SAXO2     |
| RPEL1     |
| SLC16A8   |
| CXCL11    |
| SPATA17   |
| CLEC4E    |
| ZMYND10   |
| TRIM34    |
| CFAP43    |
| C20orf144 |
| IL33      |
| CNN1      |
| TMIGD3    |
| PLA1A     |
| S100B     |
| CA14      |
| ACTG2     |
| POPDC2    |
| GPBAR1    |

|          |
|----------|
| LY86     |
| P2RY13   |
| CALHM6   |
| FCGR1A   |
| SYNPO2   |
| LY96     |
| LYRM9    |
| HCST     |
| KIF17    |
| PRAM1    |
| HSD17B14 |
| C4A      |
| GNGT2    |
| VSIG4    |
| MNDA     |
| GSTO2    |
| KCNE4    |
| HLA-DRB5 |
| RNASE6   |
| MGP      |
| ALOX5AP  |
| GPR34    |
| GLIPR1   |
| CSF3R    |
| LST1     |
| AIF1     |
| C3AR1    |
| LAYN     |
| CELSR3   |
| ECSCR    |
| C1orf162 |
| AMIGO2   |
| CD40     |
| ZNF233   |
| RGS1     |
| MS4A7    |
| MS4A6A   |
| MYL9     |
| JAML     |
| KCNJ8    |
| RENBP    |
| PCED1B   |
| SLA      |

|          |
|----------|
| PLSCR4   |
| HLA-DQA1 |
| GIMAP7   |
| TYROBP   |
| HMMR     |
| TAGLN    |
| PIP4P2   |
| KCNJ14   |
| SELENOM  |
| CLEC2B   |
| SOD3     |
| C1orf54  |
| MAN1C1   |
| RARRES2  |
| TMEM184A |
| NNMT     |
| GPSM3    |
| VCAM1    |
| FCER1G   |
| HACD4    |
| GMFG     |
| C1QA     |
| GUCY1B1  |
| CDC42EP3 |
| ESPL1    |
| IL18BP   |
| GIMAP4   |
| FERMT2   |
| SPI1     |
| TSC22D3  |
| VAMP5    |
| RHOJ     |
| LY6G5C   |
| C1S      |
| RAMP2    |
| TOP2A    |
| TNFSF12  |
| CENPF    |
| SRGN     |
| FILIP1L  |
| ABCC4    |
| SPAG5    |
| KLHL5    |



|          |
|----------|
| TMEM204  |
| C1R      |
| KIAA0895 |
| SERPING1 |
| CALD1    |
| KIF14    |
| CAMSAP3  |
| KIF18B   |
| EMP3     |
| KIF20A   |
| FHL3     |
| RASSF4   |
| EVA1B    |
| DKK3     |
| ADAP1    |
| TPX2     |
| PRR11    |
| DBF4B    |
| IL1R1    |
| LACC1    |
| IGFBP7   |
| PRC1     |
| HNMT     |
| TIMP1    |
| SHTN1    |
| KLHL22   |
| PNPO     |
| GAN      |
| SMIM29   |
| OSTM1    |
| BPNT1    |
| ARID5A   |
| AP1M2    |
| CCDC77   |
| PATJ     |
| NINJ1    |
| CC2D1A   |
| FAM89B   |
| RRP12    |
| PPP6R1   |
| ERBB3    |
| SUN1     |
| PLEKHA8  |

|         |
|---------|
| CEP89   |
| MSANTD3 |
| HUS1    |
| NCAPD2  |
| INTS1   |
| PANK3   |
| ISCU    |
| GABARAP |
| NSF     |
| ATXN7L3 |
| DNAJC7  |
| LARP4B  |
| EFTUD2  |
| AP2B1   |

**Supplementary Table 2.** List of 228 DEGs.

| No. | Gene     | Full name                                                  | Function                                         |
|-----|----------|------------------------------------------------------------|--------------------------------------------------|
| 1   | TPX2     | TPX2 microtubule nucleation factor                         | Importin-alpha family protein binding            |
| 2   | TMEM184A | Transmembrane protein 184A                                 | Heparin binding, transporter activity            |
| 3   | INTS1    | Integrator complex subunit 1                               | RNA Polymerase II Transcription                  |
| 4   | GMFG     | Glia maturation factor gamma                               | Arp2/3 complex binding                           |
| 5   | ARID5A   | AT-rich interaction domain 5A                              | DNA binding, RNA binding                         |
| 6   | HUS1     | HUS1 checkpoint clamp component                            | Protein binding, DNA damage checkpoint           |
| 7   | CSMD3    | CUB and Sushi multiple domains 3                           | Regulation of dendrite development               |
| 8   | C1S      | Complement C1s                                             | Calcium ion binding, identical protein binding   |
| 9   | KIF17    | Kinesin family member 17                                   | ATP binding ATPase activity                      |
| 10  | PRC1     | Protein regulator of cytokinesis 1                         | Kinesin binding, microtubule binding             |
| 11  | CALD1    | Caldesmon 1                                                | Actin binding, cadherin binding                  |
| 12  | ZFP42    | ZFP42 zinc finger protein                                  | DNA-binding transcription factor activity        |
| 13  | IL1R1    | Interleukin 1 receptor type 1                              | NAD(P)+ nucleosidase activity                    |
| 14  | KCNJ8    | Potassium inwardly rectifying channel subfamily J member 8 | ATP binding                                      |
| 15  | C1orf162 | Chromosome 1 open reading frame 162                        | Integral component of membrane                   |
| 16  | ESPL1    | Extra spindle pole bodies like 1, separase                 | Catalytic activity                               |
| 17  | LCT      | Lactase                                                    | beta-glucosidase activity                        |
| 18  | CEACAM20 | CEA cell adhesion molecule 20                              | Immune system process                            |
| 19  | TLX2     | T cell leukemia homeobox 2                                 | DNA-binding transcription activator activity     |
| 20  | CD40     | CD40 molecule                                              | Antigen binding, enzyme binding                  |
| 21  | SUN1     | Sad1 and UNC84 domain containing 1                         | Cytoskeleton-nuclear membrane anchor activity    |
| 22  | GSTO2    | Glutathione S-transferase omega 2                          | Glutathione dehydrogenase (ascorbate) activity   |
| 23  | MAN1C1   | Mannosidase alpha class 1C member 1                        | Calcium ion binding, protein binding             |
| 24  | LHX1     | LIM homeobox 1                                             | DNA-binding transcription factor activity        |
| 25  | LHX3     | LIM homeobox 3                                             | Metal ion binding, sequence-specific DNA binding |
| 26  | TMEM190  | Transmembrane protein 190                                  | Protein binding, protein self-association        |
| 27  | DBF4B    | DBF4 zinc finger B                                         | Nucleic acid binding, protein binding            |
| 28  | LARP4B   | La ribonucleoprotein 4B                                    | RNA binding, protein binding                     |

### Supplementary Table 3 Functional roles of the 28 genes
